# Supplementary material
Source: publisher figshare collection journal article supplement (https://rs.figshare.com/ndownloader/files/17544665)
Supplement: Supplementary file 1 [file 17544665]

## Sheet: MTS
participant	response	sex	perspective	bodylocation	inducer	group
1	4	female	allocentric	hand	real hand	Control
1	4	female	allocentric	hand	paintbrush	Control
1	3	female	allocentric	hand	fake hand	Control
1	4	male	allocentric	hand	real hand	Control
1	4	male	allocentric	hand	paintbrush	Control
1	5	male	allocentric	hand	fake hand	Control
1	4	female	egocentric	hand	real hand	Control
1	4	female	egocentric	hand	paintbrush	Control
1	4	female	egocentric	hand	fake hand	Control
1	4	male	egocentric	hand	real hand	Control
1	4	male	egocentric	hand	paintbrush	Control
1	3	male	egocentric	hand	fake hand	Control
1	4	female	allocentric	ear	real hand	Control
1	4	female	allocentric	ear	paintbrush	Control
1	4	female	allocentric	ear	fake hand	Control
1	5	female	allocentric	neck	real hand	Control
1	4	female	allocentric	neck	paintbrush	Control
1	5	female	allocentric	neck	fake hand	Control
1	4	male	allocentric	ear	real hand	Control
1	4	male	allocentric	ear	paintbrush	Control
1	3	male	allocentric	ear	fake hand	Control
1	4	male	allocentric	neck	real hand	Control
1	4	female	allocentric	neck	paintbrush	Control
1	5	male	allocentric	neck	fake hand	Control
2	3	female	allocentric	hand	real hand	Control
2	2	female	allocentric	hand	paintbrush	Control
2	3	female	allocentric	hand	fake hand	Control
2	2	male	allocentric	hand	real hand	Control
2	2	male	allocentric	hand	paintbrush	Control
2	2	male	allocentric	hand	fake hand	Control
2	3	female	egocentric	hand	real hand	Control
2	2	female	egocentric	hand	paintbrush	Control
2	3	female	egocentric	hand	fake hand	Control
2	2	male	egocentric	hand	real hand	Control
2	3	male	egocentric	hand	paintbrush	Control
2	2	male	egocentric	hand	fake hand	Control
2	2	female	allocentric	ear	real hand	Control
2	4	female	allocentric	ear	paintbrush	Control
2	2	female	allocentric	ear	fake hand	Control
2	2	female	allocentric	neck	real hand	Control
2	2	female	allocentric	neck	paintbrush	Control
2	2	female	allocentric	neck	fake hand	Control
2	2	male	allocentric	ear	real hand	Control
2	2	male	allocentric	ear	paintbrush	Control
2	2	male	allocentric	ear	fake hand	Control
2	2	male	allocentric	neck	real hand	Control
2	3	female	allocentric	neck	paintbrush	Control
2	3	male	allocentric	neck	fake hand	Control
3	1	female	allocentric	hand	real hand	Control
3	1	female	allocentric	hand	paintbrush	Control
3	1	female	allocentric	hand	fake hand	Control
3	1	male	allocentric	hand	real hand	Control
3	1	male	allocentric	hand	paintbrush	Control
3	1	male	allocentric	hand	fake hand	Control
3	1	female	egocentric	hand	real hand	Control
3	1	female	egocentric	hand	paintbrush	Control
3	1	female	egocentric	hand	fake hand	Control
3	1	male	egocentric	hand	real hand	Control
3	1	male	egocentric	hand	paintbrush	Control
3	1	male	egocentric	hand	fake hand	Control
3	1	female	allocentric	ear	real hand	Control
3	1	female	allocentric	ear	paintbrush	Control
3	1	female	allocentric	ear	fake hand	Control
3	1	female	allocentric	neck	real hand	Control
3	1	female	allocentric	neck	paintbrush	Control
3	4	female	allocentric	neck	fake hand	Control
3	2	male	allocentric	ear	real hand	Control
3	1	male	allocentric	ear	paintbrush	Control
3	2	male	allocentric	ear	fake hand	Control
3	2	male	allocentric	neck	real hand	Control
3	1	female	allocentric	neck	paintbrush	Control
3	2	male	allocentric	neck	fake hand	Control
4	7	female	allocentric	hand	real hand	Control
4	5	female	allocentric	hand	paintbrush	Control
4	7	female	allocentric	hand	fake hand	Control
4	2	male	allocentric	hand	real hand	Control
4	3	male	allocentric	hand	paintbrush	Control
4	6	male	allocentric	hand	fake hand	Control
4	3	female	egocentric	hand	real hand	Control
4	2	female	egocentric	hand	paintbrush	Control
4	6	female	egocentric	hand	fake hand	Control
4	1	male	egocentric	hand	real hand	Control
4	1	male	egocentric	hand	paintbrush	Control
4	2	male	egocentric	hand	fake hand	Control
4	3	female	allocentric	ear	real hand	Control
4	2	female	allocentric	ear	paintbrush	Control
4	3	female	allocentric	ear	fake hand	Control
4	6	female	allocentric	neck	real hand	Control
4	1	female	allocentric	neck	paintbrush	Control
4	2	female	allocentric	neck	fake hand	Control
4	6	male	allocentric	ear	real hand	Control
4	4	male	allocentric	ear	paintbrush	Control
4	2	male	allocentric	ear	fake hand	Control
4	1	male	allocentric	neck	real hand	Control
4	1	female	allocentric	neck	paintbrush	Control
4	6	male	allocentric	neck	fake hand	Control
5	2	female	allocentric	hand	real hand	Control
5	2	female	allocentric	hand	paintbrush	Control
5	1	female	allocentric	hand	fake hand	Control
5	2	male	allocentric	hand	real hand	Control
5	3	male	allocentric	hand	paintbrush	Control
5	2	male	allocentric	hand	fake hand	Control
5	1	female	egocentric	hand	real hand	Control
5	5	female	egocentric	hand	paintbrush	Control
5	5	female	egocentric	hand	fake hand	Control
5	1	male	egocentric	hand	real hand	Control
5	1	male	egocentric	hand	paintbrush	Control
5	1	male	egocentric	hand	fake hand	Control
5	2	female	allocentric	ear	real hand	Control
5	1	female	allocentric	ear	paintbrush	Control
5	1	female	allocentric	ear	fake hand	Control
5	1	female	allocentric	neck	real hand	Control
5	2	female	allocentric	neck	paintbrush	Control
5	1	female	allocentric	neck	fake hand	Control
5	2	male	allocentric	ear	real hand	Control
5	6	male	allocentric	ear	paintbrush	Control
5	1	male	allocentric	ear	fake hand	Control
5	1	male	allocentric	neck	real hand	Control
5	2	female	allocentric	neck	paintbrush	Control
5	1	male	allocentric	neck	fake hand	Control
6	1	female	allocentric	hand	real hand	Control
6	1	female	allocentric	hand	paintbrush	Control
6	1	female	allocentric	hand	fake hand	Control
6	1	male	allocentric	hand	real hand	Control
6	1	male	allocentric	hand	paintbrush	Control
6	1	male	allocentric	hand	fake hand	Control
6	1	female	egocentric	hand	real hand	Control
6	1	female	egocentric	hand	paintbrush	Control
6	1	female	egocentric	hand	fake hand	Control
6	1	male	egocentric	hand	real hand	Control
6	1	male	egocentric	hand	paintbrush	Control
6	1	male	egocentric	hand	fake hand	Control
6	1	female	allocentric	ear	real hand	Control
6	2	female	allocentric	ear	paintbrush	Control
6	1	female	allocentric	ear	fake hand	Control
6	1	female	allocentric	neck	real hand	Control
6	1	female	allocentric	neck	paintbrush	Control
6	1	female	allocentric	neck	fake hand	Control
6	1	male	allocentric	ear	real hand	Control
6	1	male	allocentric	ear	paintbrush	Control
6	2	male	allocentric	ear	fake hand	Control
6	1	male	allocentric	neck	real hand	Control
6	1	female	allocentric	neck	paintbrush	Control
6	1	male	allocentric	neck	fake hand	Control
7	2	female	allocentric	hand	real hand	Control
7	3	female	allocentric	hand	paintbrush	Control
7	3	female	allocentric	hand	fake hand	Control
7	3	male	allocentric	hand	real hand	Control
7	2	male	allocentric	hand	paintbrush	Control
7	2	male	allocentric	hand	fake hand	Control
7	2	female	egocentric	hand	real hand	Control
7	2	female	egocentric	hand	paintbrush	Control
7	2	female	egocentric	hand	fake hand	Control
7	2	male	egocentric	hand	real hand	Control
7	3	male	egocentric	hand	paintbrush	Control
7	2	male	egocentric	hand	fake hand	Control
7	5	female	allocentric	ear	real hand	Control
7	5	female	allocentric	ear	paintbrush	Control
7	5	female	allocentric	ear	fake hand	Control
7	6	female	allocentric	neck	real hand	Control
7	5	female	allocentric	neck	paintbrush	Control
7	5	female	allocentric	neck	fake hand	Control
7	2	male	allocentric	ear	real hand	Control
7	5	male	allocentric	ear	paintbrush	Control
7	5	male	allocentric	ear	fake hand	Control
7	5	male	allocentric	neck	real hand	Control
7	5	female	allocentric	neck	paintbrush	Control
7	5	male	allocentric	neck	fake hand	Control
8	1	female	allocentric	hand	real hand	Control
8	1	female	allocentric	hand	paintbrush	Control
8	1	female	allocentric	hand	fake hand	Control
8	1	male	allocentric	hand	real hand	Control
8	1	male	allocentric	hand	paintbrush	Control
8	1	male	allocentric	hand	fake hand	Control
8	1	female	egocentric	hand	real hand	Control
8	1	female	egocentric	hand	paintbrush	Control
8	1	female	egocentric	hand	fake hand	Control
8	1	male	egocentric	hand	real hand	Control
8	1	male	egocentric	hand	paintbrush	Control
8	1	male	egocentric	hand	fake hand	Control
8	1	female	allocentric	ear	real hand	Control
8	1	female	allocentric	ear	paintbrush	Control
8	1	female	allocentric	ear	fake hand	Control
8	1	female	allocentric	neck	real hand	Control
8	1	female	allocentric	neck	paintbrush	Control
8	1	female	allocentric	neck	fake hand	Control
8	1	male	allocentric	ear	real hand	Control
8	1	male	allocentric	ear	paintbrush	Control
8	1	male	allocentric	ear	fake hand	Control
8	1	male	allocentric	neck	real hand	Control
8	1	female	allocentric	neck	paintbrush	Control
8	1	male	allocentric	neck	fake hand	Control
9	1	female	allocentric	hand	real hand	Control
9	1	female	allocentric	hand	paintbrush	Control
9	1	female	allocentric	hand	fake hand	Control
9	1	male	allocentric	hand	real hand	Control
9	1	male	allocentric	hand	paintbrush	Control
9	1	male	allocentric	hand	fake hand	Control
9	1	female	egocentric	hand	real hand	Control
9	1	female	egocentric	hand	paintbrush	Control
9	1	female	egocentric	hand	fake hand	Control
9	1	male	egocentric	hand	real hand	Control
9	1	male	egocentric	hand	paintbrush	Control
9	1	male	egocentric	hand	fake hand	Control
9	1	female	allocentric	ear	real hand	Control
9	2	female	allocentric	ear	paintbrush	Control
9	1	female	allocentric	ear	fake hand	Control
9	1	female	allocentric	neck	real hand	Control
9	1	female	allocentric	neck	paintbrush	Control
9	2	female	allocentric	neck	fake hand	Control
9	1	male	allocentric	ear	real hand	Control
9	1	male	allocentric	ear	paintbrush	Control
9	2	male	allocentric	ear	fake hand	Control
9	2	male	allocentric	neck	real hand	Control
9	2	female	allocentric	neck	paintbrush	Control
9	1	male	allocentric	neck	fake hand	Control
10	1	female	allocentric	hand	real hand	Control
10	5	female	allocentric	hand	paintbrush	Control
10	4	female	allocentric	hand	fake hand	Control
10	5	male	allocentric	hand	real hand	Control
10	4	male	allocentric	hand	paintbrush	Control
10	3	male	allocentric	hand	fake hand	Control
10	3	female	egocentric	hand	real hand	Control
10	3	female	egocentric	hand	paintbrush	Control
10	3	female	egocentric	hand	fake hand	Control
10	3	male	egocentric	hand	real hand	Control
10	6	male	egocentric	hand	paintbrush	Control
10	3	male	egocentric	hand	fake hand	Control
10	5	female	allocentric	ear	real hand	Control
10	7	female	allocentric	ear	paintbrush	Control
10	1	female	allocentric	ear	fake hand	Control
10	7	female	allocentric	neck	real hand	Control
10	7	female	allocentric	neck	paintbrush	Control
10	7	female	allocentric	neck	fake hand	Control
10	4	male	allocentric	ear	real hand	Control
10	7	male	allocentric	ear	paintbrush	Control
10	4	male	allocentric	ear	fake hand	Control
10	6	male	allocentric	neck	real hand	Control
10	7	female	allocentric	neck	paintbrush	Control
10	4	male	allocentric	neck	fake hand	Control
1	1	female	allocentric	hand	real hand	OS
1	1	female	allocentric	hand	paintbrush	OS
1	2	female	allocentric	hand	fake hand	OS
1	1	male	allocentric	hand	real hand	OS
1	1	male	allocentric	hand	paintbrush	OS
1	2	male	allocentric	hand	fake hand	OS
1	1	female	egocentric	hand	real hand	OS
1	2	female	egocentric	hand	paintbrush	OS
1	2	female	egocentric	hand	fake hand	OS
1	1	male	egocentric	hand	real hand	OS
1	1	male	egocentric	hand	paintbrush	OS
1	1	male	egocentric	hand	fake hand	OS
1	1	female	allocentric	ear	real hand	OS
1	2	female	allocentric	ear	paintbrush	OS
1	1	female	allocentric	ear	fake hand	OS
1	2	female	allocentric	neck	real hand	OS
1	1	female	allocentric	neck	paintbrush	OS
1	1	female	allocentric	neck	fake hand	OS
1	1	male	allocentric	ear	real hand	OS
1	2	male	allocentric	ear	paintbrush	OS
1	2	male	allocentric	ear	fake hand	OS
1	2	male	allocentric	neck	real hand	OS
1	2	female	allocentric	neck	paintbrush	OS
1	1	male	allocentric	neck	fake hand	OS
2	3	female	allocentric	hand	real hand	OS
2	2	female	allocentric	hand	paintbrush	OS
2	3	female	allocentric	hand	fake hand	OS
2	4	male	allocentric	hand	real hand	OS
2	2	male	allocentric	hand	paintbrush	OS
2	2	male	allocentric	hand	fake hand	OS
2	2	female	egocentric	hand	real hand	OS
2	3	female	egocentric	hand	paintbrush	OS
2	3	female	egocentric	hand	fake hand	OS
2	4	male	egocentric	hand	real hand	OS
2	2	male	egocentric	hand	paintbrush	OS
2	3	male	egocentric	hand	fake hand	OS
2	4	female	allocentric	ear	real hand	OS
2	4	female	allocentric	ear	paintbrush	OS
2	4	female	allocentric	ear	fake hand	OS
2	4	female	allocentric	neck	real hand	OS
2	2	female	allocentric	neck	paintbrush	OS
2	2	female	allocentric	neck	fake hand	OS
2	3	male	allocentric	ear	real hand	OS
2	4	male	allocentric	ear	paintbrush	OS
2	2	male	allocentric	ear	fake hand	OS
2	3	male	allocentric	neck	real hand	OS
2	2	female	allocentric	neck	paintbrush	OS
2	2	male	allocentric	neck	fake hand	OS
3	6	female	allocentric	hand	real hand	OS
3	7	female	allocentric	hand	paintbrush	OS
3	5	female	allocentric	hand	fake hand	OS
3	3	male	allocentric	hand	real hand	OS
3	6	male	allocentric	hand	paintbrush	OS
3	5	male	allocentric	hand	fake hand	OS
3	6	female	egocentric	hand	real hand	OS
3	5	female	egocentric	hand	paintbrush	OS
3	5	female	egocentric	hand	fake hand	OS
3	5	male	egocentric	hand	real hand	OS
3	2	male	egocentric	hand	paintbrush	OS
3	6	male	egocentric	hand	fake hand	OS
3	6	female	allocentric	ear	real hand	OS
3	5	female	allocentric	ear	paintbrush	OS
3	4	female	allocentric	ear	fake hand	OS
3	6	female	allocentric	neck	real hand	OS
3	4	female	allocentric	neck	paintbrush	OS
3	5	female	allocentric	neck	fake hand	OS
3	6	male	allocentric	ear	real hand	OS
3	6	male	allocentric	ear	paintbrush	OS
3	7	male	allocentric	ear	fake hand	OS
3	6	male	allocentric	neck	real hand	OS
3	5	female	allocentric	neck	paintbrush	OS
3	5	male	allocentric	neck	fake hand	OS
4	4	female	allocentric	hand	real hand	OS
4	2	female	allocentric	hand	paintbrush	OS
4	3	female	allocentric	hand	fake hand	OS
4	3	male	allocentric	hand	real hand	OS
4	3	male	allocentric	hand	paintbrush	OS
4	3	male	allocentric	hand	fake hand	OS
4	3	female	egocentric	hand	real hand	OS
4	5	female	egocentric	hand	paintbrush	OS
4	4	female	egocentric	hand	fake hand	OS
4	3	male	egocentric	hand	real hand	OS
4	3	male	egocentric	hand	paintbrush	OS
4	3	male	egocentric	hand	fake hand	OS
4	5	female	allocentric	ear	real hand	OS
4	2	female	allocentric	ear	paintbrush	OS
4	4	female	allocentric	ear	fake hand	OS
4	5	female	allocentric	neck	real hand	OS
4	3	female	allocentric	neck	paintbrush	OS
4	4	female	allocentric	neck	fake hand	OS
4	4	male	allocentric	ear	real hand	OS
4	4	male	allocentric	ear	paintbrush	OS
4	4	male	allocentric	ear	fake hand	OS
4	4	male	allocentric	neck	real hand	OS
4	3	female	allocentric	neck	paintbrush	OS
4	3	male	allocentric	neck	fake hand	OS
5	1	female	allocentric	hand	real hand	OS
5	1	female	allocentric	hand	paintbrush	OS
5	2	female	allocentric	hand	fake hand	OS
5	1	male	allocentric	hand	real hand	OS
5	1	male	allocentric	hand	paintbrush	OS
5	1	male	allocentric	hand	fake hand	OS
5	3	female	egocentric	hand	real hand	OS
5	1	female	egocentric	hand	paintbrush	OS
5	2	female	egocentric	hand	fake hand	OS
5	1	male	egocentric	hand	real hand	OS
5	1	male	egocentric	hand	paintbrush	OS
5	1	male	egocentric	hand	fake hand	OS
5	4	female	allocentric	ear	real hand	OS
5	2	female	allocentric	ear	paintbrush	OS
5	1	female	allocentric	ear	fake hand	OS
5	1	female	allocentric	neck	real hand	OS
5	2	female	allocentric	neck	paintbrush	OS
5	4	female	allocentric	neck	fake hand	OS
5	1	male	allocentric	ear	real hand	OS
5	2	male	allocentric	ear	paintbrush	OS
5	4	male	allocentric	ear	fake hand	OS
5	4	male	allocentric	neck	real hand	OS
5	1	female	allocentric	neck	paintbrush	OS
5	1	male	allocentric	neck	fake hand	OS
6	1	female	allocentric	hand	real hand	OS
6	1	female	allocentric	hand	paintbrush	OS
6	1	female	allocentric	hand	fake hand	OS
6	1	male	allocentric	hand	real hand	OS
6	1	male	allocentric	hand	paintbrush	OS
6	1	male	allocentric	hand	fake hand	OS
6	1	female	egocentric	hand	real hand	OS
6	1	female	egocentric	hand	paintbrush	OS
6	1	female	egocentric	hand	fake hand	OS
6	1	male	egocentric	hand	real hand	OS
6	1	male	egocentric	hand	paintbrush	OS
6	1	male	egocentric	hand	fake hand	OS
6	1	female	allocentric	ear	real hand	OS
6	1	female	allocentric	ear	paintbrush	OS
6	1	female	allocentric	ear	fake hand	OS
6	1	female	allocentric	neck	real hand	OS
6	1	female	allocentric	neck	paintbrush	OS
6	1	female	allocentric	neck	fake hand	OS
6	1	male	allocentric	ear	real hand	OS
6	1	male	allocentric	ear	paintbrush	OS
6	1	male	allocentric	ear	fake hand	OS
6	1	male	allocentric	neck	real hand	OS
6	1	female	allocentric	neck	paintbrush	OS
6	1	male	allocentric	neck	fake hand	OS
7	3	female	allocentric	hand	real hand	OS
7	2	female	allocentric	hand	paintbrush	OS
7	2	female	allocentric	hand	fake hand	OS
7	2	male	allocentric	hand	real hand	OS
7	1	male	allocentric	hand	paintbrush	OS
7	1	male	allocentric	hand	fake hand	OS
7	2	female	egocentric	hand	real hand	OS
7	3	female	egocentric	hand	paintbrush	OS
7	1	female	egocentric	hand	fake hand	OS
7	2	male	egocentric	hand	real hand	OS
7	2	male	egocentric	hand	paintbrush	OS
7	1	male	egocentric	hand	fake hand	OS
7	3	female	allocentric	ear	real hand	OS
7	3	female	allocentric	ear	paintbrush	OS
7	2	female	allocentric	ear	fake hand	OS
7	2	female	allocentric	neck	real hand	OS
7	2	female	allocentric	neck	paintbrush	OS
7	2	female	allocentric	neck	fake hand	OS
7	4	male	allocentric	ear	real hand	OS
7	3	male	allocentric	ear	paintbrush	OS
7	3	male	allocentric	ear	fake hand	OS
7	3	male	allocentric	neck	real hand	OS
7	5	female	allocentric	neck	paintbrush	OS
7	2	male	allocentric	neck	fake hand	OS
8	4	female	allocentric	hand	real hand	OS
8	3	female	allocentric	hand	paintbrush	OS
8	3	female	allocentric	hand	fake hand	OS
8	4	male	allocentric	hand	real hand	OS
8	4	male	allocentric	hand	paintbrush	OS
8	4	male	allocentric	hand	fake hand	OS
8	4	female	egocentric	hand	real hand	OS
8	4	female	egocentric	hand	paintbrush	OS
8	4	female	egocentric	hand	fake hand	OS
8	4	male	egocentric	hand	real hand	OS
8	3	male	egocentric	hand	paintbrush	OS
8	3	male	egocentric	hand	fake hand	OS
8	4	female	allocentric	ear	real hand	OS
8	4	female	allocentric	ear	paintbrush	OS
8	3	female	allocentric	ear	fake hand	OS
8	4	female	allocentric	neck	real hand	OS
8	4	female	allocentric	neck	paintbrush	OS
8	3	female	allocentric	neck	fake hand	OS
8	4	male	allocentric	ear	real hand	OS
8	3	male	allocentric	ear	paintbrush	OS
8	3	male	allocentric	ear	fake hand	OS
8	3	male	allocentric	neck	real hand	OS
8	4	female	allocentric	neck	paintbrush	OS
8	4	male	allocentric	neck	fake hand	OS
9	2	female	allocentric	hand	real hand	OS
9	1	female	allocentric	hand	paintbrush	OS
9	2	female	allocentric	hand	fake hand	OS
9	1	male	allocentric	hand	real hand	OS
9	1	male	allocentric	hand	paintbrush	OS
9	5	male	allocentric	hand	fake hand	OS
9	1	female	egocentric	hand	real hand	OS
9	3	female	egocentric	hand	paintbrush	OS
9	6	female	egocentric	hand	fake hand	OS
9	5	male	egocentric	hand	real hand	OS
9	3	male	egocentric	hand	paintbrush	OS
9	2	male	egocentric	hand	fake hand	OS
9	1	female	allocentric	ear	real hand	OS
9	1	female	allocentric	ear	paintbrush	OS
9	1	female	allocentric	ear	fake hand	OS
9	1	female	allocentric	neck	real hand	OS
9	1	female	allocentric	neck	paintbrush	OS
9	1	female	allocentric	neck	fake hand	OS
9	7	male	allocentric	ear	real hand	OS
9	3	male	allocentric	ear	paintbrush	OS
9	1	male	allocentric	ear	fake hand	OS
9	1	male	allocentric	neck	real hand	OS
9	4	female	allocentric	neck	paintbrush	OS
9	5	male	allocentric	neck	fake hand	OS
10	3	female	allocentric	hand	real hand	OS
10	1	female	allocentric	hand	paintbrush	OS
10	1	female	allocentric	hand	fake hand	OS
10	1	male	allocentric	hand	real hand	OS
10	1	male	allocentric	hand	paintbrush	OS
10	1	male	allocentric	hand	fake hand	OS
10	1	female	egocentric	hand	real hand	OS
10	1	female	egocentric	hand	paintbrush	OS
10	3	female	egocentric	hand	fake hand	OS
10	1	male	egocentric	hand	real hand	OS
10	1	male	egocentric	hand	paintbrush	OS
10	1	male	egocentric	hand	fake hand	OS
10	1	female	allocentric	ear	real hand	OS
10	1	female	allocentric	ear	paintbrush	OS
10	1	female	allocentric	ear	fake hand	OS
10	1	female	allocentric	neck	real hand	OS
10	1	female	allocentric	neck	paintbrush	OS
10	1	female	allocentric	neck	fake hand	OS
10	1	male	allocentric	ear	real hand	OS
10	1	male	allocentric	ear	paintbrush	OS
10	1	male	allocentric	ear	fake hand	OS
10	1	male	allocentric	neck	real hand	OS
10	1	female	allocentric	neck	paintbrush	OS
10	1	male	allocentric	neck	fake hand	OS
1	5	female	allocentric	hand	real hand	MTS
1	5	female	allocentric	hand	paintbrush	MTS
1	5	female	allocentric	hand	fake hand	MTS
1	5	male	allocentric	hand	real hand	MTS
1	5	male	allocentric	hand	paintbrush	MTS
1	6	male	allocentric	hand	fake hand	MTS
1	5	female	egocentric	hand	real hand	MTS
1	5	female	egocentric	hand	paintbrush	MTS
1	6	female	egocentric	hand	fake hand	MTS
1	5	male	egocentric	hand	real hand	MTS
1	5	male	egocentric	hand	paintbrush	MTS
1	5	male	egocentric	hand	fake hand	MTS
1	4	female	allocentric	ear	real hand	MTS
1	6	female	allocentric	ear	paintbrush	MTS
1	6	female	allocentric	ear	fake hand	MTS
1	5	female	allocentric	neck	real hand	MTS
1	4	female	allocentric	neck	paintbrush	MTS
1	4	female	allocentric	neck	fake hand	MTS
1	6	male	allocentric	ear	real hand	MTS
1	7	male	allocentric	ear	paintbrush	MTS
1	6	male	allocentric	ear	fake hand	MTS
1	7	male	allocentric	neck	real hand	MTS
1	6	female	allocentric	neck	paintbrush	MTS
1	5	male	allocentric	neck	fake hand	MTS
2	6	female	allocentric	hand	real hand	MTS
2	4	female	allocentric	hand	paintbrush	MTS
2	5	female	allocentric	hand	fake hand	MTS
2	6	male	allocentric	hand	real hand	MTS
2	4	male	allocentric	hand	paintbrush	MTS
2	5	male	allocentric	hand	fake hand	MTS
2	6	female	egocentric	hand	real hand	MTS
2	5	female	egocentric	hand	paintbrush	MTS
2	5	female	egocentric	hand	fake hand	MTS
2	5	male	egocentric	hand	real hand	MTS
2	4	male	egocentric	hand	paintbrush	MTS
2	6	male	egocentric	hand	fake hand	MTS
2	6	female	allocentric	ear	real hand	MTS
2	4	female	allocentric	ear	paintbrush	MTS
2	5	female	allocentric	ear	fake hand	MTS
2	7	female	allocentric	neck	real hand	MTS
2	4	female	allocentric	neck	paintbrush	MTS
2	5	female	allocentric	neck	fake hand	MTS
2	6	male	allocentric	ear	real hand	MTS
2	3	male	allocentric	ear	paintbrush	MTS
2	5	male	allocentric	ear	fake hand	MTS
2	7	male	allocentric	neck	real hand	MTS
2	5	female	allocentric	neck	paintbrush	MTS
2	6	male	allocentric	neck	fake hand	MTS
3	4	female	allocentric	hand	real hand	MTS
3	7	female	allocentric	hand	paintbrush	MTS
3	2	female	allocentric	hand	fake hand	MTS
3	6	male	allocentric	hand	real hand	MTS
3	7	male	allocentric	hand	paintbrush	MTS
3	3	male	allocentric	hand	fake hand	MTS
3	7	female	egocentric	hand	real hand	MTS
3	7	female	egocentric	hand	paintbrush	MTS
3	5	female	egocentric	hand	fake hand	MTS
3	5	male	egocentric	hand	real hand	MTS
3	7	male	egocentric	hand	paintbrush	MTS
3	2	male	egocentric	hand	fake hand	MTS
3	6	female	allocentric	ear	real hand	MTS
3	7	female	allocentric	ear	paintbrush	MTS
3	4	female	allocentric	ear	fake hand	MTS
3	7	female	allocentric	neck	real hand	MTS
3	7	female	allocentric	neck	paintbrush	MTS
3	1	female	allocentric	neck	fake hand	MTS
3	7	male	allocentric	ear	real hand	MTS
3	3	male	allocentric	ear	paintbrush	MTS
3	2	male	allocentric	ear	fake hand	MTS
3	7	male	allocentric	neck	real hand	MTS
3	7	female	allocentric	neck	paintbrush	MTS
3	2	male	allocentric	neck	fake hand	MTS
4	5	female	allocentric	hand	real hand	MTS
4	6	female	allocentric	hand	paintbrush	MTS
4	6	female	allocentric	hand	fake hand	MTS
4	5	male	allocentric	hand	real hand	MTS
4	6	male	allocentric	hand	paintbrush	MTS
4	5	male	allocentric	hand	fake hand	MTS
4	5	female	egocentric	hand	real hand	MTS
4	6	female	egocentric	hand	paintbrush	MTS
4	5	female	egocentric	hand	fake hand	MTS
4	6	male	egocentric	hand	real hand	MTS
4	6	male	egocentric	hand	paintbrush	MTS
4	6	male	egocentric	hand	fake hand	MTS
4	5	female	allocentric	ear	real hand	MTS
4	5	female	allocentric	ear	paintbrush	MTS
4	5	female	allocentric	ear	fake hand	MTS
4	7	female	allocentric	neck	real hand	MTS
4	7	female	allocentric	neck	paintbrush	MTS
4	7	female	allocentric	neck	fake hand	MTS
4	5	male	allocentric	ear	real hand	MTS
4	5	male	allocentric	ear	paintbrush	MTS
4	5	male	allocentric	ear	fake hand	MTS
4	7	male	allocentric	neck	real hand	MTS
4	7	female	allocentric	neck	paintbrush	MTS
4	7	male	allocentric	neck	fake hand	MTS
5	7	female	allocentric	hand	real hand	MTS
5	6	female	allocentric	hand	paintbrush	MTS
5	5	female	allocentric	hand	fake hand	MTS
5	7	male	allocentric	hand	real hand	MTS
5	5	male	allocentric	hand	paintbrush	MTS
5	7	male	allocentric	hand	fake hand	MTS
5	3	female	egocentric	hand	real hand	MTS
5	7	female	egocentric	hand	paintbrush	MTS
5	7	female	egocentric	hand	fake hand	MTS
5	4	male	egocentric	hand	real hand	MTS
5	6	male	egocentric	hand	paintbrush	MTS
5	5	male	egocentric	hand	fake hand	MTS
5	3	female	allocentric	ear	real hand	MTS
5	4	female	allocentric	ear	paintbrush	MTS
5	3	female	allocentric	ear	fake hand	MTS
5	7	female	allocentric	neck	real hand	MTS
5	5	female	allocentric	neck	paintbrush	MTS
5	5	female	allocentric	neck	fake hand	MTS
5	7	male	allocentric	ear	real hand	MTS
5	4	male	allocentric	ear	paintbrush	MTS
5	6	male	allocentric	ear	fake hand	MTS
5	7	male	allocentric	neck	real hand	MTS
5	7	female	allocentric	neck	paintbrush	MTS
5	6	male	allocentric	neck	fake hand	MTS
6	4	female	allocentric	hand	real hand	MTS
6	5	female	allocentric	hand	paintbrush	MTS
6	3	female	allocentric	hand	fake hand	MTS
6	4	male	allocentric	hand	real hand	MTS
6	4	male	allocentric	hand	paintbrush	MTS
6	4	male	allocentric	hand	fake hand	MTS
6	3	female	egocentric	hand	real hand	MTS
6	2	female	egocentric	hand	paintbrush	MTS
6	5	female	egocentric	hand	fake hand	MTS
6	3	male	egocentric	hand	real hand	MTS
6	3	male	egocentric	hand	paintbrush	MTS
6	3	male	egocentric	hand	fake hand	MTS
6	7	female	allocentric	ear	real hand	MTS
6	5	female	allocentric	ear	paintbrush	MTS
6	7	female	allocentric	ear	fake hand	MTS
6	7	female	allocentric	neck	real hand	MTS
6	7	female	allocentric	neck	paintbrush	MTS
6	6	female	allocentric	neck	fake hand	MTS
6	5	male	allocentric	ear	real hand	MTS
6	6	male	allocentric	ear	paintbrush	MTS
6	7	male	allocentric	ear	fake hand	MTS
6	7	male	allocentric	neck	real hand	MTS
6	7	female	allocentric	neck	paintbrush	MTS
6	6	male	allocentric	neck	fake hand	MTS
7	5	female	allocentric	hand	real hand	MTS
7	5	female	allocentric	hand	paintbrush	MTS
7	5	female	allocentric	hand	fake hand	MTS
7	5	male	allocentric	hand	real hand	MTS
7	5	male	allocentric	hand	paintbrush	MTS
7	6	male	allocentric	hand	fake hand	MTS
7	5	female	egocentric	hand	real hand	MTS
7	5	female	egocentric	hand	paintbrush	MTS
7	5	female	egocentric	hand	fake hand	MTS
7	5	male	egocentric	hand	real hand	MTS
7	5	male	egocentric	hand	paintbrush	MTS
7	5	male	egocentric	hand	fake hand	MTS
7	5	female	allocentric	ear	real hand	MTS
7	6	female	allocentric	ear	paintbrush	MTS
7	5	female	allocentric	ear	fake hand	MTS
7	5	female	allocentric	neck	real hand	MTS
7	6	female	allocentric	neck	paintbrush	MTS
7	5	female	allocentric	neck	fake hand	MTS
7	5	male	allocentric	ear	real hand	MTS
7	6	male	allocentric	ear	paintbrush	MTS
7	5	male	allocentric	ear	fake hand	MTS
7	6	male	allocentric	neck	real hand	MTS
7	6	female	allocentric	neck	paintbrush	MTS
7	6	male	allocentric	neck	fake hand	MTS
8	6	female	allocentric	hand	real hand	MTS
8	5	female	allocentric	hand	paintbrush	MTS
8	6	female	allocentric	hand	fake hand	MTS
8	6	male	allocentric	hand	real hand	MTS
8	5	male	allocentric	hand	paintbrush	MTS
8	6	male	allocentric	hand	fake hand	MTS
8	5	female	egocentric	hand	real hand	MTS
8	7	female	egocentric	hand	paintbrush	MTS
8	6	female	egocentric	hand	fake hand	MTS
8	3	male	egocentric	hand	real hand	MTS
8	6	male	egocentric	hand	paintbrush	MTS
8	6	male	egocentric	hand	fake hand	MTS
8	2	female	allocentric	ear	real hand	MTS
8	6	female	allocentric	ear	paintbrush	MTS
8	3	female	allocentric	ear	fake hand	MTS
8	7	female	allocentric	neck	real hand	MTS
8	7	female	allocentric	neck	paintbrush	MTS
8	4	female	allocentric	neck	fake hand	MTS
8	3	male	allocentric	ear	real hand	MTS
8	6	male	allocentric	ear	paintbrush	MTS
8	6	male	allocentric	ear	fake hand	MTS
8	6	male	allocentric	neck	real hand	MTS
8	6	female	allocentric	neck	paintbrush	MTS
8	5	male	allocentric	neck	fake hand	MTS
9	5	female	allocentric	hand	real hand	MTS
9	5	female	allocentric	hand	paintbrush	MTS
9	6	female	allocentric	hand	fake hand	MTS
9	6	male	allocentric	hand	real hand	MTS
9	6	male	allocentric	hand	paintbrush	MTS
9	6	male	allocentric	hand	fake hand	MTS
9	6	female	egocentric	hand	real hand	MTS
9	5	female	egocentric	hand	paintbrush	MTS
9	5	female	egocentric	hand	fake hand	MTS
9	6	male	egocentric	hand	real hand	MTS
9	6	male	egocentric	hand	paintbrush	MTS
9	4	male	egocentric	hand	fake hand	MTS
9	6	female	allocentric	ear	real hand	MTS
9	5	female	allocentric	ear	paintbrush	MTS
9	5	female	allocentric	ear	fake hand	MTS
9	5	female	allocentric	neck	real hand	MTS
9	6	female	allocentric	neck	paintbrush	MTS
9	6	female	allocentric	neck	fake hand	MTS
9	5	male	allocentric	ear	real hand	MTS
9	6	male	allocentric	ear	paintbrush	MTS
9	6	male	allocentric	ear	fake hand	MTS
9	5	male	allocentric	neck	real hand	MTS
9	6	female	allocentric	neck	paintbrush	MTS
9	5	male	allocentric	neck	fake hand	MTS
10	5	female	allocentric	hand	real hand	MTS
10	3	female	allocentric	hand	paintbrush	MTS
10	3	female	allocentric	hand	fake hand	MTS
10	5	male	allocentric	hand	real hand	MTS
10	3	male	allocentric	hand	paintbrush	MTS
10	5	male	allocentric	hand	fake hand	MTS
10	6	female	egocentric	hand	real hand	MTS
10	6	female	egocentric	hand	paintbrush	MTS
10	6	female	egocentric	hand	fake hand	MTS
10	6	male	egocentric	hand	real hand	MTS
10	5	male	egocentric	hand	paintbrush	MTS
10	3	male	egocentric	hand	fake hand	MTS
10	5	female	allocentric	ear	real hand	MTS
10	4	female	allocentric	ear	paintbrush	MTS
10	5	female	allocentric	ear	fake hand	MTS
10	4	female	allocentric	neck	real hand	MTS
10	6	female	allocentric	neck	paintbrush	MTS
10	6	female	allocentric	neck	fake hand	MTS
10	6	male	allocentric	ear	real hand	MTS
10	3	male	allocentric	ear	paintbrush	MTS
10	6	male	allocentric	ear	fake hand	MTS
10	7	male	allocentric	neck	real hand	MTS
10	6	female	allocentric	neck	paintbrush	MTS
10	5	male	allocentric	neck	fake hand	MTS

## Sheet: TMI
participant	response	material	Objectproperty	group
1	5	bubblewrap	force	Control
1	4	bubblewrap	resistance	Control
1	5	bubblewrap	texture	Control
1	4	bubblewrap	weight	Control
1	4	iceblock	force	Control
1	4	iceblock	resistance	Control
1	5	iceblock	texture	Control
1	4	iceblock	weight	Control
1	4	sandpaper	force	Control
1	5	sandpaper	resistance	Control
1	5	sandpaper	texture	Control
1	4	sandpaper	weight	Control
1	4	velvet	force	Control
1	4	velvet	resistance	Control
1	4	velvet	texture	Control
1	3	velvet	weight	Control
1	5	wetSponge	force	Control
1	4	wetSponge	resistance	Control
1	5	wetSponge	texture	Control
1	4	wetSponge	weight	Control
2	4	bubblewrap	force	Control
2	3	bubblewrap	resistance	Control
2	5	bubblewrap	texture	Control
2	6	bubblewrap	weight	Control
2	2	iceblock	force	Control
2	6	iceblock	resistance	Control
2	6	iceblock	texture	Control
2	3	iceblock	weight	Control
2	2	sandpaper	force	Control
2	6	sandpaper	resistance	Control
2	6	sandpaper	texture	Control
2	2	sandpaper	weight	Control
2	5	velvet	force	Control
2	2	velvet	resistance	Control
2	6	velvet	texture	Control
2	2	velvet	weight	Control
2	3	wetSponge	force	Control
2	2	wetSponge	resistance	Control
2	4	wetSponge	texture	Control
2	4	wetSponge	weight	Control
3	5	bubblewrap	force	Control
3	3	bubblewrap	resistance	Control
3	5	bubblewrap	texture	Control
3	3	bubblewrap	weight	Control
3	2	iceblock	force	Control
3	3	iceblock	resistance	Control
3	5	iceblock	texture	Control
3	3	iceblock	weight	Control
3	2	sandpaper	force	Control
3	3	sandpaper	resistance	Control
3	5	sandpaper	texture	Control
3	2	sandpaper	weight	Control
3	5	velvet	force	Control
3	3	velvet	resistance	Control
3	3	velvet	texture	Control
3	5	velvet	weight	Control
3	4	wetSponge	force	Control
3	3	wetSponge	resistance	Control
3	4	wetSponge	texture	Control
3	4	wetSponge	weight	Control
4	7	bubblewrap	force	Control
4	5	bubblewrap	resistance	Control
4	6	bubblewrap	texture	Control
4	5	bubblewrap	weight	Control
4	6	iceblock	force	Control
4	7	iceblock	resistance	Control
4	4	iceblock	texture	Control
4	5	iceblock	weight	Control
4	3	sandpaper	force	Control
4	5	sandpaper	resistance	Control
4	7	sandpaper	texture	Control
4	5	sandpaper	weight	Control
4	1	velvet	force	Control
4	7	velvet	resistance	Control
4	4	velvet	texture	Control
4	2	velvet	weight	Control
4	5	wetSponge	force	Control
4	5	wetSponge	texture	Control
4	7	wetSponge	weight	Control
4	6	wetSponge	resistance	Control
5	5	bubblewrap	force	Control
5	4	bubblewrap	resistance	Control
5	4	bubblewrap	texture	Control
5	3	bubblewrap	weight	Control
5	3	iceblock	force	Control
5	6	iceblock	resistance	Control
5	5	iceblock	texture	Control
5	4	iceblock	weight	Control
5	1	sandpaper	force	Control
5	5	sandpaper	resistance	Control
5	5	sandpaper	texture	Control
5	2	sandpaper	weight	Control
5	3	velvet	force	Control
5	5	velvet	resistance	Control
5	3	velvet	texture	Control
5	5	velvet	weight	Control
5	5	wetSponge	force	Control
5	5	wetSponge	resistance	Control
5	4	wetSponge	texture	Control
5	5	wetSponge	weight	Control
6	1	bubblewrap	force	Control
6	1	bubblewrap	resistance	Control
6	1	bubblewrap	texture	Control
6	1	bubblewrap	weight	Control
6	2	iceblock	force	Control
6	3	iceblock	resistance	Control
6	7	iceblock	texture	Control
6	2	iceblock	weight	Control
6	1	sandpaper	force	Control
6	1	sandpaper	resistance	Control
6	7	sandpaper	texture	Control
6	2	sandpaper	weight	Control
6	2	velvet	force	Control
6	1	velvet	resistance	Control
6	5	velvet	texture	Control
6	2	velvet	weight	Control
6	4	wetSponge	force	Control
6	1	wetSponge	resistance	Control
6	7	wetSponge	texture	Control
6	2	wetSponge	weight	Control
7	7	bubblewrap	force	Control
7	6	bubblewrap	resistance	Control
7	6	bubblewrap	texture	Control
7	6	bubblewrap	weight	Control
7	7	iceblock	force	Control
7	6	iceblock	resistance	Control
7	6	iceblock	texture	Control
7	6	iceblock	weight	Control
7	6	sandpaper	force	Control
7	7	sandpaper	resistance	Control
7	7	sandpaper	texture	Control
7	6	sandpaper	weight	Control
7	5	velvet	force	Control
7	5	velvet	resistance	Control
7	6	velvet	texture	Control
7	4	velvet	weight	Control
7	3	wetSponge	force	Control
7	7	wetSponge	resistance	Control
7	5	wetSponge	texture	Control
7	4	wetSponge	weight	Control
8	3	bubblewrap	force	Control
8	5	bubblewrap	resistance	Control
8	6	bubblewrap	texture	Control
8	4	bubblewrap	weight	Control
8	6	iceblock	force	Control
8	6	iceblock	resistance	Control
8	7	iceblock	texture	Control
8	6	iceblock	weight	Control
8	5	sandpaper	force	Control
8	6	sandpaper	resistance	Control
8	7	sandpaper	texture	Control
8	5	sandpaper	weight	Control
8	3	velvet	force	Control
8	5	velvet	resistance	Control
8	6	velvet	texture	Control
8	4	velvet	weight	Control
8	6	wetSponge	force	Control
8	5	wetSponge	resistance	Control
8	7	wetSponge	texture	Control
8	4	wetSponge	weight	Control
9	1	bubblewrap	force	Control
9	1	bubblewrap	resistance	Control
9	2	bubblewrap	texture	Control
9	1	bubblewrap	weight	Control
9	1	iceblock	force	Control
9	1	iceblock	resistance	Control
9	2	iceblock	texture	Control
9	1	iceblock	weight	Control
9	1	sandpaper	force	Control
9	3	sandpaper	resistance	Control
9	1	sandpaper	texture	Control
9	1	sandpaper	weight	Control
9	1	velvet	force	Control
9	1	velvet	resistance	Control
9	2	velvet	texture	Control
9	1	velvet	weight	Control
9	1	wetSponge	force	Control
9	1	wetSponge	resistance	Control
9	2	wetSponge	texture	Control
9	1	wetSponge	weight	Control
10	7	bubblewrap	force	Control
10	7	bubblewrap	resistance	Control
10	7	bubblewrap	texture	Control
10	7	bubblewrap	weight	Control
10	4	iceblock	force	Control
10	7	iceblock	resistance	Control
10	7	iceblock	texture	Control
10	4	iceblock	weight	Control
10	5	sandpaper	force	Control
10	7	sandpaper	resistance	Control
10	7	sandpaper	texture	Control
10	7	sandpaper	weight	Control
10	5	velvet	force	Control
10	7	velvet	resistance	Control
10	7	velvet	texture	Control
10	7	velvet	weight	Control
10	7	wetSponge	force	Control
10	7	wetSponge	resistance	Control
10	7	wetSponge	texture	Control
10	6	wetSponge	weight	Control
1	7	bubblewrap	force	OS
1	6	bubblewrap	resistance	OS
1	7	bubblewrap	texture	OS
1	5	bubblewrap	weight	OS
1	7	iceblock	force	OS
1	7	iceblock	resistance	OS
1	7	iceblock	texture	OS
1	6	iceblock	weight	OS
1	6	sandpaper	force	OS
1	6	sandpaper	resistance	OS
1	7	sandpaper	texture	OS
1	6	sandpaper	weight	OS
1	6	velvet	force	OS
1	7	velvet	resistance	OS
1	7	velvet	texture	OS
1	6	velvet	weight	OS
1	7	wetSponge	force	OS
1	6	wetSponge	resistance	OS
1	7	wetSponge	texture	OS
1	7	wetSponge	weight	OS
2	7	bubblewrap	force	OS
2	7	bubblewrap	resistance	OS
2	7	bubblewrap	texture	OS
2	7	bubblewrap	weight	OS
2	6	iceblock	force	OS
2	6	iceblock	resistance	OS
2	7	iceblock	texture	OS
2	6	iceblock	weight	OS
2	5	sandpaper	force	OS
2	7	sandpaper	resistance	OS
2	7	sandpaper	texture	OS
2	5	sandpaper	weight	OS
2	7	velvet	force	OS
2	5	velvet	resistance	OS
2	6	velvet	texture	OS
2	7	velvet	weight	OS
2	7	wetSponge	force	OS
2	7	wetSponge	resistance	OS
2	7	wetSponge	texture	OS
2	6	wetSponge	weight	OS
3	6	bubblewrap	force	OS
3	6	bubblewrap	resistance	OS
3	2	bubblewrap	texture	OS
3	5	bubblewrap	weight	OS
3	2	iceblock	force	OS
3	2	iceblock	resistance	OS
3	2	iceblock	texture	OS
3	2	iceblock	weight	OS
3	7	sandpaper	force	OS
3	7	sandpaper	resistance	OS
3	7	sandpaper	texture	OS
3	6	sandpaper	weight	OS
3	4	velvet	force	OS
3	6	velvet	resistance	OS
3	5	velvet	weight	OS
3	6	velvet	texture	OS
3	7	wetSponge	resistance	OS
3	6	wetSponge	texture	OS
3	5	wetSponge	weight	OS
3	7	wetSponge	force	OS
4	5	bubblewrap	force	OS
4	4	bubblewrap	resistance	OS
4	4	bubblewrap	texture	OS
4	5	bubblewrap	weight	OS
4	4	iceblock	force	OS
4	5	iceblock	resistance	OS
4	4	iceblock	texture	OS
4	4	iceblock	weight	OS
4	3	sandpaper	force	OS
4	3	sandpaper	resistance	OS
4	4	sandpaper	texture	OS
4	2	sandpaper	weight	OS
4	3	velvet	force	OS
4	3	velvet	resistance	OS
4	3	velvet	texture	OS
4	3	velvet	weight	OS
4	4	wetSponge	force	OS
4	5	wetSponge	resistance	OS
4	3	wetSponge	texture	OS
4	4	wetSponge	weight	OS
5	4	bubblewrap	force	OS
5	3	bubblewrap	resistance	OS
5	2	bubblewrap	texture	OS
5	1	bubblewrap	weight	OS
5	2	iceblock	force	OS
5	2	iceblock	resistance	OS
5	2	iceblock	texture	OS
5	1	iceblock	weight	OS
5	2	sandpaper	force	OS
5	5	sandpaper	resistance	OS
5	6	sandpaper	texture	OS
5	1	sandpaper	weight	OS
5	2	velvet	force	OS
5	1	velvet	resistance	OS
5	3	velvet	texture	OS
5	1	velvet	weight	OS
5	4	wetSponge	force	OS
5	2	wetSponge	resistance	OS
5	3	wetSponge	texture	OS
5	3	wetSponge	weight	OS
6	4	bubblewrap	force	OS
6	3	bubblewrap	resistance	OS
6	5	bubblewrap	texture	OS
6	2	bubblewrap	weight	OS
6	4	iceblock	force	OS
6	4	iceblock	resistance	OS
6	6	iceblock	texture	OS
6	4	iceblock	weight	OS
6	3	sandpaper	force	OS
6	6	sandpaper	resistance	OS
6	7	sandpaper	texture	OS
6	2	sandpaper	weight	OS
6	6	velvet	force	OS
6	6	velvet	resistance	OS
6	7	velvet	texture	OS
6	5	velvet	weight	OS
6	7	wetSponge	force	OS
6	1	wetSponge	resistance	OS
6	3	wetSponge	texture	OS
6	5	wetSponge	weight	OS
7	6	bubblewrap	force	OS
7	4	bubblewrap	resistance	OS
7	7	bubblewrap	texture	OS
7	4	bubblewrap	weight	OS
7	1	iceblock	force	OS
7	6	iceblock	resistance	OS
7	7	iceblock	texture	OS
7	1	iceblock	weight	OS
7	1	sandpaper	force	OS
7	7	sandpaper	resistance	OS
7	7	sandpaper	texture	OS
7	1	sandpaper	weight	OS
7	3	velvet	force	OS
7	3	velvet	resistance	OS
7	6	velvet	texture	OS
7	6	velvet	weight	OS
7	6	wetSponge	force	OS
7	6	wetSponge	resistance	OS
7	7	wetSponge	texture	OS
7	4	wetSponge	weight	OS
8	5	bubblewrap	force	OS
8	5	bubblewrap	resistance	OS
8	5	bubblewrap	texture	OS
8	5	bubblewrap	weight	OS
8	5	iceblock	force	OS
8	5	iceblock	resistance	OS
8	5	iceblock	texture	OS
8	5	iceblock	weight	OS
8	5	sandpaper	force	OS
8	5	sandpaper	resistance	OS
8	5	sandpaper	texture	OS
8	5	sandpaper	weight	OS
8	5	velvet	force	OS
8	5	velvet	resistance	OS
8	5	velvet	texture	OS
8	4	velvet	weight	OS
8	5	wetSponge	force	OS
8	5	wetSponge	resistance	OS
8	5	wetSponge	texture	OS
8	5	wetSponge	weight	OS
9	5	bubblewrap	force	OS
9	2	bubblewrap	resistance	OS
9	5	bubblewrap	texture	OS
9	5	bubblewrap	weight	OS
9	2	iceblock	force	OS
9	1	iceblock	resistance	OS
9	2	iceblock	texture	OS
9	1	iceblock	weight	OS
9	2	sandpaper	force	OS
9	5	sandpaper	resistance	OS
9	6	sandpaper	texture	OS
9	2	sandpaper	weight	OS
9	4	velvet	force	OS
9	1	velvet	resistance	OS
9	3	velvet	texture	OS
9	5	velvet	weight	OS
9	4	wetSponge	force	OS
9	3	wetSponge	resistance	OS
9	3	wetSponge	texture	OS
9	4	wetSponge	weight	OS
10	6	bubblewrap	force	OS
10	6	bubblewrap	resistance	OS
10	6	bubblewrap	texture	OS
10	6	bubblewrap	weight	OS
10	4	iceblock	force	OS
10	1	iceblock	resistance	OS
10	6	iceblock	texture	OS
10	6	iceblock	weight	OS
10	6	sandpaper	force	OS
10	6	sandpaper	resistance	OS
10	6	sandpaper	texture	OS
10	6	sandpaper	weight	OS
10	6	velvet	force	OS
10	6	velvet	resistance	OS
10	6	velvet	texture	OS
10	6	velvet	weight	OS
10	6	wetSponge	force	OS
10	6	wetSponge	resistance	OS
10	6	wetSponge	texture	OS
10	6	wetSponge	weight	OS
1	7	bubblewrap	force	MTS
1	7	bubblewrap	resistance	MTS
1	7	bubblewrap	texture	MTS
1	7	bubblewrap	weight	MTS
1	7	iceblock	force	MTS
1	7	iceblock	resistance	MTS
1	7	iceblock	texture	MTS
1	7	iceblock	weight	MTS
1	7	sandpaper	force	MTS
1	7	sandpaper	resistance	MTS
1	7	sandpaper	texture	MTS
1	7	sandpaper	weight	MTS
1	7	velvet	force	MTS
1	7	velvet	resistance	MTS
1	7	velvet	texture	MTS
1	7	velvet	weight	MTS
1	7	wetSponge	force	MTS
1	7	wetSponge	resistance	MTS
1	7	wetSponge	texture	MTS
1	7	wetSponge	weight	MTS
2	7	bubblewrap	force	MTS
2	7	bubblewrap	resistance	MTS
2	7	bubblewrap	texture	MTS
2	7	bubblewrap	weight	MTS
2	7	iceblock	force	MTS
2	3	iceblock	resistance	MTS
2	7	iceblock	texture	MTS
2	7	iceblock	weight	MTS
2	3	sandpaper	force	MTS
2	7	sandpaper	resistance	MTS
2	7	sandpaper	texture	MTS
2	2	sandpaper	weight	MTS
2	3	velvet	force	MTS
2	6	velvet	resistance	MTS
2	4	velvet	texture	MTS
2	4	velvet	weight	MTS
2	7	wetSponge	force	MTS
2	7	wetSponge	resistance	MTS
2	7	wetSponge	texture	MTS
2	7	wetSponge	weight	MTS
3	7	bubblewrap	force	MTS
3	7	bubblewrap	resistance	MTS
3	7	bubblewrap	texture	MTS
3	7	bubblewrap	weight	MTS
3	2	iceblock	force	MTS
3	2	iceblock	resistance	MTS
3	7	iceblock	texture	MTS
3	7	iceblock	weight	MTS
3	3	sandpaper	force	MTS
3	3	sandpaper	resistance	MTS
3	3	sandpaper	texture	MTS
3	3	sandpaper	weight	MTS
3	5	velvet	force	MTS
3	5	velvet	resistance	MTS
3	6	velvet	texture	MTS
3	3	velvet	weight	MTS
3	7	wetSponge	force	MTS
3	7	wetSponge	resistance	MTS
3	7	wetSponge	texture	MTS
3	7	wetSponge	weight	MTS
4	7	bubblewrap	force	MTS
4	7	bubblewrap	resistance	MTS
4	7	bubblewrap	texture	MTS
4	7	bubblewrap	weight	MTS
4	6	iceblock	force	MTS
4	7	iceblock	resistance	MTS
4	7	iceblock	texture	MTS
4	6	iceblock	weight	MTS
4	7	sandpaper	force	MTS
4	7	sandpaper	resistance	MTS
4	7	sandpaper	texture	MTS
4	7	sandpaper	weight	MTS
4	6	velvet	force	MTS
4	3	velvet	resistance	MTS
4	7	velvet	texture	MTS
4	6	velvet	weight	MTS
4	6	wetSponge	force	MTS
4	7	wetSponge	resistance	MTS
4	7	wetSponge	texture	MTS
4	7	wetSponge	weight	MTS
5	2	bubblewrap	force	MTS
5	2	bubblewrap	resistance	MTS
5	2	bubblewrap	texture	MTS
5	2	bubblewrap	weight	MTS
5	2	iceblock	force	MTS
5	3	iceblock	resistance	MTS
5	5	iceblock	texture	MTS
5	3	iceblock	weight	MTS
5	6	sandpaper	force	MTS
5	7	sandpaper	resistance	MTS
5	5	sandpaper	texture	MTS
5	2	sandpaper	weight	MTS
5	7	velvet	force	MTS
5	5	velvet	resistance	MTS
5	6	velvet	texture	MTS
5	6	velvet	weight	MTS
5	6	wetSponge	force	MTS
5	4	wetSponge	resistance	MTS
5	3	wetSponge	texture	MTS
5	5	wetSponge	weight	MTS
6	7	bubblewrap	force	MTS
6	7	bubblewrap	resistance	MTS
6	7	bubblewrap	texture	MTS
6	7	bubblewrap	weight	MTS
6	4	iceblock	force	MTS
6	7	iceblock	resistance	MTS
6	7	iceblock	texture	MTS
6	4	iceblock	weight	MTS
6	7	sandpaper	force	MTS
6	7	sandpaper	resistance	MTS
6	7	sandpaper	texture	MTS
6	7	sandpaper	weight	MTS
6	3	velvet	force	MTS
6	7	velvet	resistance	MTS
6	1	velvet	texture	MTS
6	5	velvet	weight	MTS
6	7	wetSponge	force	MTS
6	7	wetSponge	resistance	MTS
6	7	wetSponge	texture	MTS
6	7	wetSponge	weight	MTS
7	6	bubblewrap	force	MTS
7	5	bubblewrap	resistance	MTS
7	6	bubblewrap	texture	MTS
7	5	bubblewrap	weight	MTS
7	6	iceblock	force	MTS
7	6	iceblock	resistance	MTS
7	6	iceblock	texture	MTS
7	6	iceblock	weight	MTS
7	5	sandpaper	force	MTS
7	6	sandpaper	resistance	MTS
7	6	sandpaper	texture	MTS
7	6	sandpaper	weight	MTS
7	6	velvet	force	MTS
7	6	velvet	resistance	MTS
7	6	velvet	texture	MTS
7	6	velvet	weight	MTS
7	6	wetSponge	force	MTS
7	6	wetSponge	resistance	MTS
7	6	wetSponge	texture	MTS
7	6	wetSponge	weight	MTS
8	4	bubblewrap	force	MTS
8	4	bubblewrap	resistance	MTS
8	6	bubblewrap	texture	MTS
8	6	bubblewrap	weight	MTS
8	6	iceblock	force	MTS
8	7	iceblock	resistance	MTS
8	7	iceblock	texture	MTS
8	6	iceblock	weight	MTS
8	4	sandpaper	force	MTS
8	5	sandpaper	resistance	MTS
8	7	sandpaper	texture	MTS
8	6	sandpaper	weight	MTS
8	6	velvet	force	MTS
8	6	velvet	resistance	MTS
8	6	velvet	texture	MTS
8	7	velvet	weight	MTS
8	6	wetSponge	force	MTS
8	6	wetSponge	resistance	MTS
8	7	wetSponge	texture	MTS
8	7	wetSponge	weight	MTS
9	7	bubblewrap	force	MTS
9	7	bubblewrap	resistance	MTS
9	7	bubblewrap	texture	MTS
9	7	bubblewrap	weight	MTS
9	7	iceblock	force	MTS
9	7	iceblock	resistance	MTS
9	7	iceblock	texture	MTS
9	7	iceblock	weight	MTS
9	1	sandpaper	force	MTS
9	7	sandpaper	resistance	MTS
9	7	sandpaper	texture	MTS
9	3	sandpaper	weight	MTS
9	6	velvet	force	MTS
9	5	velvet	resistance	MTS
9	7	velvet	texture	MTS
9	7	velvet	weight	MTS
9	7	wetSponge	force	MTS
9	7	wetSponge	resistance	MTS
9	7	wetSponge	texture	MTS
9	7	wetSponge	weight	MTS
10	7	bubblewrap	force	MTS
10	6	bubblewrap	resistance	MTS
10	7	bubblewrap	texture	MTS
10	7	bubblewrap	weight	MTS
10	7	iceblock	force	MTS
10	6	iceblock	resistance	MTS
10	7	iceblock	texture	MTS
10	7	iceblock	weight	MTS
10	5	sandpaper	force	MTS
10	7	sandpaper	resistance	MTS
10	7	sandpaper	texture	MTS
10	3	sandpaper	weight	MTS
10	4	velvet	force	MTS
10	6	velvet	resistance	MTS
10	7	velvet	weight	MTS
10	6	velvet	texture	MTS
10	7	wetSponge	resistance	MTS
10	6	wetSponge	weight	MTS
10	7	wetSponge	force	MTS
10	6	wetSponge	texture	MTS

## Sheet: SMI
participant	BodyPart	TouchSensResp	BodyRegion	group
1	abdomen	4	upperbody	Control
2	abdomen	4	upperbody	Control
3	abdomen	6	upperbody	Control
4	abdomen	5	upperbody	Control
5	abdomen	4	upperbody	Control
6	abdomen	7	upperbody	Control
7	abdomen	4	upperbody	Control
8	abdomen	6	upperbody	Control
9	abdomen	5	upperbody	Control
10	abdomen	4	upperbody	Control
1	balloffoot	5	foot	Control
2	balloffoot	1	foot	Control
3	balloffoot	2	foot	Control
4	balloffoot	6	foot	Control
5	balloffoot	7	foot	Control
6	balloffoot	4	foot	Control
7	balloffoot	6	foot	Control
8	balloffoot	3	foot	Control
9	balloffoot	4	foot	Control
10	balloffoot	1	foot	Control
1	cheek	4	head	Control
2	cheek	3	head	Control
3	cheek	6	head	Control
4	cheek	6	head	Control
5	cheek	5	head	Control
6	cheek	4	head	Control
7	cheek	6	head	Control
8	cheek	5	head	Control
9	cheek	5	head	Control
10	cheek	7	head	Control
1	chest	5	upperbody	Control
2	chest	5	upperbody	Control
3	chest	5	upperbody	Control
4	chest	5	upperbody	Control
5	chest	7	upperbody	Control
6	chest	7	upperbody	Control
7	chest	4	upperbody	Control
8	chest	4	upperbody	Control
9	chest	2	upperbody	Control
10	chest	5	upperbody	Control
1	ears	4	head	Control
2	ears	4	head	Control
3	ears	3	head	Control
4	ears	7	head	Control
5	ears	6	head	Control
6	ears	7	head	Control
7	ears	5	head	Control
8	ears	6	head	Control
9	ears	5	head	Control
10	ears	6	head	Control
1	fingerdorsal	3	hand	Control
2	fingerdorsal	3	hand	Control
3	fingerdorsal	3	hand	Control
4	fingerdorsal	3	hand	Control
5	fingerdorsal	4	hand	Control
6	fingerdorsal	4	hand	Control
7	fingerdorsal	6	hand	Control
8	fingerdorsal	5	hand	Control
9	fingerdorsal	2	hand	Control
10	fingerdorsal	3	hand	Control
1	fingertip	4	hand	Control
2	fingertip	1	hand	Control
3	fingertip	3	hand	Control
4	fingertip	6	hand	Control
5	fingertip	7	hand	Control
6	fingertip	5	hand	Control
7	fingertip	4	hand	Control
8	fingertip	5	hand	Control
9	fingertip	4	hand	Control
10	fingertip	5	hand	Control
1	fingerunderside	4	hand	Control
2	fingerunderside	3	hand	Control
3	fingerunderside	3	hand	Control
4	fingerunderside	5	hand	Control
5	fingerunderside	5	hand	Control
6	fingerunderside	4	hand	Control
7	fingerunderside	6	hand	Control
8	fingerunderside	4	hand	Control
9	fingerunderside	4	hand	Control
10	fingerunderside	4	hand	Control
1	footdorsal	4	foot	Control
2	footdorsal	2	foot	Control
3	footdorsal	4	foot	Control
4	footdorsal	6	foot	Control
5	footdorsal	6	foot	Control
6	footdorsal	4	foot	Control
7	footdorsal	3	foot	Control
8	footdorsal	6	foot	Control
9	footdorsal	4	foot	Control
10	footdorsal	3	foot	Control
1	forearms	4	upperbody	Control
2	forearms	5	upperbody	Control
3	forearms	5	upperbody	Control
4	forearms	5	upperbody	Control
5	forearms	4	upperbody	Control
6	forearms	7	upperbody	Control
7	forearms	5	upperbody	Control
8	forearms	4	upperbody	Control
9	forearms	4	upperbody	Control
10	forearms	7	upperbody	Control
1	forehead	4	head	Control
2	forehead	3	head	Control
3	forehead	3	head	Control
4	forehead	2	head	Control
5	forehead	7	head	Control
6	forehead	4	head	Control
7	forehead	5	head	Control
8	forehead	4	head	Control
9	forehead	6	head	Control
10	forehead	6	head	Control
1	handpalm	4	hand	Control
2	handpalm	3	hand	Control
3	handpalm	4	hand	Control
4	handpalm	5	hand	Control
5	handpalm	6	hand	Control
6	handpalm	7	hand	Control
7	handpalm	3	hand	Control
8	handpalm	6	hand	Control
9	handpalm	5	hand	Control
10	handpalm	7	hand	Control
1	handdorsal	4	hand	Control
2	handdorsal	3	hand	Control
3	handdorsal	3	hand	Control
4	handdorsal	4	hand	Control
5	handdorsal	5	hand	Control
6	handdorsal	6	hand	Control
7	handdorsal	6	hand	Control
8	handdorsal	5	hand	Control
9	handdorsal	4	hand	Control
10	handdorsal	1	hand	Control
1	lowerleg	4	lowerbody	Control
2	lowerleg	2	lowerbody	Control
3	lowerleg	3	lowerbody	Control
4	lowerleg	5	lowerbody	Control
5	lowerleg	1	lowerbody	Control
6	lowerleg	6	lowerbody	Control
7	lowerleg	6	lowerbody	Control
8	lowerleg	6	lowerbody	Control
9	lowerleg	4	lowerbody	Control
10	lowerleg	5	lowerbody	Control
1	mouth	5	head	Control
2	mouth	5	head	Control
3	mouth	5	head	Control
4	mouth	7	head	Control
5	mouth	7	head	Control
6	mouth	7	head	Control
7	mouth	5	head	Control
8	mouth	7	head	Control
9	mouth	4	head	Control
10	mouth	5	head	Control
1	neck	5	upperbody	Control
2	neck	5	upperbody	Control
3	neck	5	upperbody	Control
4	neck	7	upperbody	Control
5	neck	5	upperbody	Control
6	neck	7	upperbody	Control
7	neck	6	upperbody	Control
8	neck	7	upperbody	Control
9	neck	6	upperbody	Control
10	neck	7	upperbody	Control
1	nose	4	head	Control
2	nose	2	head	Control
3	nose	3	head	Control
4	nose	5	head	Control
5	nose	5	head	Control
6	nose	4	head	Control
7	nose	5	head	Control
8	nose	5	head	Control
9	nose	5	head	Control
10	nose	5	head	Control
1	thighs	4	lowerbody	Control
2	thighs	6	lowerbody	Control
3	thighs	6	lowerbody	Control
4	thighs	5	lowerbody	Control
5	thighs	1	lowerbody	Control
6	thighs	5	lowerbody	Control
7	thighs	4	lowerbody	Control
8	thighs	6	lowerbody	Control
9	thighs	6	lowerbody	Control
10	thighs	6	lowerbody	Control
1	toes	4	foot	Control
2	toes	5	foot	Control
3	toes	3	foot	Control
4	toes	4	foot	Control
5	toes	3	foot	Control
6	toes	5	foot	Control
7	toes	3	foot	Control
8	toes	4	foot	Control
9	toes	3	foot	Control
10	toes	1	foot	Control
1	footunderside	5	foot	Control
2	footunderside	7	foot	Control
3	footunderside	6	foot	Control
4	footunderside	4	foot	Control
5	footunderside	7	foot	Control
6	footunderside	7	foot	Control
7	footunderside	2	foot	Control
8	footunderside	7	foot	Control
9	footunderside	6	foot	Control
10	footunderside	5	foot	Control
1	upperarms	4	upperbody	Control
2	upperarms	3	upperbody	Control
3	upperarms	3	upperbody	Control
4	upperarms	5	upperbody	Control
5	upperarms	5	upperbody	Control
6	upperarms	6	upperbody	Control
7	upperarms	4	upperbody	Control
8	upperarms	4	upperbody	Control
9	upperarms	5	upperbody	Control
10	upperarms	7	upperbody	Control
1	abdomen	5	upperbody	OS
2	abdomen	7	upperbody	OS
3	abdomen	6	upperbody	OS
4	abdomen	6	upperbody	OS
5	abdomen	3	upperbody	OS
6	abdomen	4	upperbody	OS
7	abdomen	6	upperbody	OS
8	abdomen	5	upperbody	OS
9	abdomen	2	upperbody	OS
10	abdomen	3	upperbody	OS
1	balloffoot	2	foot	OS
2	balloffoot	4	foot	OS
3	balloffoot	1	foot	OS
4	balloffoot	5	foot	OS
5	balloffoot	2	foot	OS
6	balloffoot	6	foot	OS
7	balloffoot	3	foot	OS
8	balloffoot	4	foot	OS
9	balloffoot	1	foot	OS
10	balloffoot	1	foot	OS
1	cheek	4	head	OS
2	cheek	7	head	OS
3	cheek	2	head	OS
4	cheek	7	head	OS
5	cheek	5	head	OS
6	cheek	5	head	OS
7	cheek	6	head	OS
8	cheek	5	head	OS
9	cheek	3	head	OS
10	cheek	3	head	OS
1	chest	6	upperbody	OS
2	chest	7	upperbody	OS
3	chest	6	upperbody	OS
4	chest	6	upperbody	OS
5	chest	4	upperbody	OS
6	chest	2	upperbody	OS
7	chest	7	upperbody	OS
8	chest	4	upperbody	OS
9	chest	3	upperbody	OS
10	chest	2	upperbody	OS
1	ears	5	head	OS
2	ears	6	head	OS
3	ears	6	head	OS
4	ears	3	head	OS
5	ears	6	head	OS
6	ears	6	head	OS
7	ears	6	head	OS
8	ears	5	head	OS
9	ears	4	head	OS
10	ears	2	head	OS
1	fingerdorsal	2	hand	OS
2	fingerdorsal	5	hand	OS
3	fingerdorsal	6	hand	OS
4	fingerdorsal	4	hand	OS
5	fingerdorsal	3	hand	OS
6	fingerdorsal	2	hand	OS
7	fingerdorsal	4	hand	OS
8	fingerdorsal	3	hand	OS
9	fingerdorsal	1	hand	OS
10	fingerdorsal	2	hand	OS
1	fingertip	4	hand	OS
2	fingertip	7	hand	OS
3	fingertip	6	hand	OS
4	fingertip	3	hand	OS
5	fingertip	3	hand	OS
6	fingertip	5	hand	OS
7	fingertip	4	hand	OS
8	fingertip	5	hand	OS
9	fingertip	3	hand	OS
10	fingertip	4	hand	OS
1	fingerunderside	4	hand	OS
2	fingerunderside	6	hand	OS
3	fingerunderside	7	hand	OS
4	fingerunderside	4	hand	OS
5	fingerunderside	3	hand	OS
6	fingerunderside	2	hand	OS
7	fingerunderside	5	hand	OS
8	fingerunderside	3	hand	OS
9	fingerunderside	4	hand	OS
10	fingerunderside	2	hand	OS
1	footdorsal	5	foot	OS
2	footdorsal	4	foot	OS
3	footdorsal	3	foot	OS
4	footdorsal	4	foot	OS
5	footdorsal	3	foot	OS
6	footdorsal	3	foot	OS
7	footdorsal	4	foot	OS
8	footdorsal	6	foot	OS
9	footdorsal	2	foot	OS
10	footdorsal	6	foot	OS
1	forearms	6	upperbody	OS
2	forearms	6	upperbody	OS
3	forearms	3	upperbody	OS
4	forearms	2	upperbody	OS
5	forearms	3	upperbody	OS
6	forearms	2	upperbody	OS
7	forearms	6	upperbody	OS
8	forearms	3	upperbody	OS
9	forearms	5	upperbody	OS
10	forearms	2	upperbody	OS
1	forehead	4	head	OS
2	forehead	6	head	OS
3	forehead	6	head	OS
4	forehead	4	head	OS
5	forehead	2	head	OS
6	forehead	6	head	OS
7	forehead	5	head	OS
8	forehead	5	head	OS
9	forehead	3	head	OS
10	forehead	2	head	OS
1	handpalm	2	hand	OS
2	handpalm	7	hand	OS
3	handpalm	7	hand	OS
4	handpalm	4	hand	OS
5	handpalm	6	hand	OS
6	handpalm	6	hand	OS
7	handpalm	7	hand	OS
8	handpalm	4	hand	OS
9	handpalm	7	hand	OS
10	handpalm	3	hand	OS
1	handdorsal	3	hand	OS
2	handdorsal	5	hand	OS
3	handdorsal	2	hand	OS
4	handdorsal	7	hand	OS
5	handdorsal	3	hand	OS
6	handdorsal	3	hand	OS
7	handdorsal	3	hand	OS
8	handdorsal	3	hand	OS
9	handdorsal	5	hand	OS
10	handdorsal	2	hand	OS
1	lowerleg	3	lowerbody	OS
2	lowerleg	6	lowerbody	OS
3	lowerleg	4	lowerbody	OS
4	lowerleg	5	lowerbody	OS
5	lowerleg	4	lowerbody	OS
6	lowerleg	4	lowerbody	OS
7	lowerleg	5	lowerbody	OS
8	lowerleg	3	lowerbody	OS
9	lowerleg	2	lowerbody	OS
10	lowerleg	5	lowerbody	OS
1	mouth	6	head	OS
2	mouth	7	head	OS
3	mouth	7	head	OS
4	mouth	4	head	OS
5	mouth	6	head	OS
6	mouth	7	head	OS
7	mouth	5	head	OS
8	mouth	6	head	OS
9	mouth	3	head	OS
10	mouth	7	head	OS
1	neck	6	upperbody	OS
2	neck	7	upperbody	OS
3	neck	1	upperbody	OS
4	neck	4	upperbody	OS
5	neck	5	upperbody	OS
6	neck	2	upperbody	OS
7	neck	5	upperbody	OS
8	neck	6	upperbody	OS
9	neck	4	upperbody	OS
10	neck	3	upperbody	OS
1	nose	4	head	OS
2	nose	6	head	OS
3	nose	4	head	OS
4	nose	4	head	OS
5	nose	5	head	OS
6	nose	3	head	OS
7	nose	3	head	OS
8	nose	7	head	OS
9	nose	3	head	OS
10	nose	6	head	OS
1	thighs	4	lowerbody	OS
2	thighs	7	lowerbody	OS
3	thighs	6	lowerbody	OS
4	thighs	4	lowerbody	OS
5	thighs	4	lowerbody	OS
6	thighs	3	lowerbody	OS
7	thighs	5	lowerbody	OS
8	thighs	3	lowerbody	OS
9	thighs	4	lowerbody	OS
10	thighs	6	lowerbody	OS
1	toes	3	foot	OS
2	toes	7	foot	OS
3	toes	2	foot	OS
4	toes	4	foot	OS
5	toes	2	foot	OS
6	toes	2	foot	OS
7	toes	2	foot	OS
8	toes	5	foot	OS
9	toes	1	foot	OS
10	toes	2	foot	OS
1	footunderside	7	foot	OS
2	footunderside	7	foot	OS
3	footunderside	1	foot	OS
4	footunderside	3	foot	OS
5	footunderside	7	foot	OS
6	footunderside	6	foot	OS
7	footunderside	7	foot	OS
8	footunderside	5	foot	OS
9	footunderside	6	foot	OS
10	footunderside	7	foot	OS
1	upperarms	2	upperbody	OS
2	upperarms	5	upperbody	OS
3	upperarms	6	upperbody	OS
4	upperarms	4	upperbody	OS
5	upperarms	3	upperbody	OS
6	upperarms	2	upperbody	OS
7	upperarms	5	upperbody	OS
8	upperarms	3	upperbody	OS
9	upperarms	3	upperbody	OS
10	upperarms	3	upperbody	OS
1	abdomen	4	upperbody	MTS
2	abdomen	7	upperbody	MTS
3	abdomen	7	upperbody	MTS
4	abdomen	6	upperbody	MTS
5	abdomen	5	upperbody	MTS
6	abdomen	7	upperbody	MTS
7	abdomen	6	upperbody	MTS
8	abdomen	7	upperbody	MTS
9	abdomen	7	upperbody	MTS
10	abdomen	7	upperbody	MTS
1	balloffoot	2	foot	MTS
2	balloffoot	2	foot	MTS
3	balloffoot	7	foot	MTS
4	balloffoot	1	foot	MTS
5	balloffoot	2	foot	MTS
6	balloffoot	6	foot	MTS
7	balloffoot	7	foot	MTS
8	balloffoot	7	foot	MTS
9	balloffoot	4	foot	MTS
10	balloffoot	7	foot	MTS
1	cheek	5	head	MTS
2	cheek	5	head	MTS
3	cheek	6	head	MTS
4	cheek	7	head	MTS
5	cheek	3	head	MTS
6	cheek	4	head	MTS
7	cheek	6	head	MTS
8	cheek	5	head	MTS
9	cheek	6	head	MTS
10	cheek	5	head	MTS
1	chest	6	upperbody	MTS
2	chest	6	upperbody	MTS
3	chest	4	upperbody	MTS
4	chest	6	upperbody	MTS
5	chest	6	upperbody	MTS
6	chest	7	upperbody	MTS
7	chest	6	upperbody	MTS
8	chest	6	upperbody	MTS
9	chest	6	upperbody	MTS
10	chest	7	upperbody	MTS
1	ears	7	head	MTS
2	ears	7	head	MTS
3	ears	7	head	MTS
4	ears	5	head	MTS
5	ears	5	head	MTS
6	ears	7	head	MTS
7	ears	7	head	MTS
8	ears	4	head	MTS
9	ears	7	head	MTS
10	ears	7	head	MTS
1	fingerdorsal	7	hand	MTS
2	fingerdorsal	3	hand	MTS
3	fingerdorsal	3	hand	MTS
4	fingerdorsal	5	hand	MTS
5	fingerdorsal	7	hand	MTS
6	fingerdorsal	3	hand	MTS
7	fingerdorsal	6	hand	MTS
8	fingerdorsal	6	hand	MTS
9	fingerdorsal	6	hand	MTS
10	fingerdorsal	5	hand	MTS
1	fingertip	5	hand	MTS
2	fingertip	7	hand	MTS
3	fingertip	6	hand	MTS
4	fingertip	6	hand	MTS
5	fingertip	7	hand	MTS
6	fingertip	5	hand	MTS
7	fingertip	6	hand	MTS
8	fingertip	2	hand	MTS
9	fingertip	4	hand	MTS
10	fingertip	5	hand	MTS
1	fingerunderside	7	hand	MTS
2	fingerunderside	6	hand	MTS
3	fingerunderside	4	hand	MTS
4	fingerunderside	6	hand	MTS
5	fingerunderside	7	hand	MTS
6	fingerunderside	5	hand	MTS
7	fingerunderside	5	hand	MTS
8	fingerunderside	4	hand	MTS
9	fingerunderside	4	hand	MTS
10	fingerunderside	6	hand	MTS
1	footdorsal	7	foot	MTS
2	footdorsal	4	foot	MTS
3	footdorsal	6	foot	MTS
4	footdorsal	6	foot	MTS
5	footdorsal	5	foot	MTS
6	footdorsal	4	foot	MTS
7	footdorsal	6	foot	MTS
8	footdorsal	7	foot	MTS
9	footdorsal	6	foot	MTS
10	footdorsal	5	foot	MTS
1	forearms	5	upperbody	MTS
2	forearms	4	upperbody	MTS
3	forearms	7	upperbody	MTS
4	forearms	6	upperbody	MTS
5	forearms	4	upperbody	MTS
6	forearms	2	upperbody	MTS
7	forearms	6	upperbody	MTS
8	forearms	7	upperbody	MTS
9	forearms	6	upperbody	MTS
10	forearms	4	upperbody	MTS
1	forehead	7	head	MTS
2	forehead	5	head	MTS
3	forehead	7	head	MTS
4	forehead	5	head	MTS
5	forehead	7	head	MTS
6	forehead	5	head	MTS
7	forehead	6	head	MTS
8	forehead	4	head	MTS
9	forehead	4	head	MTS
10	forehead	2	head	MTS
1	handpalm	5	hand	MTS
2	handpalm	7	hand	MTS
3	handpalm	7	hand	MTS
4	handpalm	7	hand	MTS
5	handpalm	2	hand	MTS
6	handpalm	7	hand	MTS
7	handpalm	7	hand	MTS
8	handpalm	7	hand	MTS
9	handpalm	6	hand	MTS
10	handpalm	5	hand	MTS
1	handdorsal	6	hand	MTS
2	handdorsal	6	hand	MTS
3	handdorsal	7	hand	MTS
4	handdorsal	5	hand	MTS
5	handdorsal	4	hand	MTS
6	handdorsal	5	hand	MTS
7	handdorsal	6	hand	MTS
8	handdorsal	3	hand	MTS
9	handdorsal	4	hand	MTS
10	handdorsal	7	hand	MTS
1	lowerleg	5	lowerbody	MTS
2	lowerleg	5	lowerbody	MTS
3	lowerleg	2	lowerbody	MTS
4	lowerleg	5	lowerbody	MTS
5	lowerleg	2	lowerbody	MTS
6	lowerleg	3	lowerbody	MTS
7	lowerleg	5	lowerbody	MTS
8	lowerleg	4	lowerbody	MTS
9	lowerleg	5	lowerbody	MTS
10	lowerleg	6	lowerbody	MTS
1	mouth	6	head	MTS
2	mouth	7	head	MTS
3	mouth	6	head	MTS
4	mouth	7	head	MTS
5	mouth	5	head	MTS
6	mouth	6	head	MTS
7	mouth	7	head	MTS
8	mouth	6	head	MTS
9	mouth	7	head	MTS
10	mouth	7	head	MTS
1	neck	5	upperbody	MTS
2	neck	7	upperbody	MTS
3	neck	7	upperbody	MTS
4	neck	7	upperbody	MTS
5	neck	2	upperbody	MTS
6	neck	7	upperbody	MTS
7	neck	7	upperbody	MTS
8	neck	7	upperbody	MTS
9	neck	6	upperbody	MTS
10	neck	7	upperbody	MTS
1	nose	5	head	MTS
2	nose	5	head	MTS
3	nose	5	head	MTS
4	nose	7	head	MTS
5	nose	7	head	MTS
6	nose	3	head	MTS
7	nose	7	head	MTS
8	nose	2	head	MTS
9	nose	6	head	MTS
10	nose	6	head	MTS
1	thighs	6	lowerbody	MTS
2	thighs	5	lowerbody	MTS
3	thighs	3	lowerbody	MTS
4	thighs	6	lowerbody	MTS
5	thighs	7	lowerbody	MTS
6	thighs	7	lowerbody	MTS
7	thighs	5	lowerbody	MTS
8	thighs	7	lowerbody	MTS
9	thighs	7	lowerbody	MTS
10	thighs	2	lowerbody	MTS
1	toes	5	foot	MTS
2	toes	2	foot	MTS
3	toes	4	foot	MTS
4	toes	2	foot	MTS
5	toes	7	foot	MTS
6	toes	7	foot	MTS
7	toes	6	foot	MTS
8	toes	6	foot	MTS
9	toes	4	foot	MTS
10	toes	2	foot	MTS
1	footunderside	3	foot	MTS
2	footunderside	6	foot	MTS
3	footunderside	7	foot	MTS
4	footunderside	7	foot	MTS
5	footunderside	3	foot	MTS
6	footunderside	7	foot	MTS
7	footunderside	7	foot	MTS
8	footunderside	7	foot	MTS
9	footunderside	7	foot	MTS
10	footunderside	7	foot	MTS
1	upperarms	5	upperbody	MTS
2	upperarms	4	upperbody	MTS
3	upperarms	3	upperbody	MTS
4	upperarms	3	upperbody	MTS
5	upperarms	2	upperbody	MTS
6	upperarms	1	upperbody	MTS
7	upperarms	6	upperbody	MTS
8	upperarms	7	upperbody	MTS
9	upperarms	5	upperbody	MTS
10	upperarms	6	upperbody	MTS
